# Supplementary material
Source: ML conference proceedings conference paper supplement (https://openreview.net/forum?id=waLncuzMofp)
Supplement: supplementary_material [file attachment]

## A On the Dynamic Model Approximation

We provide analysis on the approximation in this section based on the deterministic MDP model in finite action space where the problem degenerates to  $Q$ -Learning. Similar results can be get to prove the Policy Evaluation Lemma, combined with Policy Improvement Lemma (given proper function approximation of the  $\arg \max$  operator) and result in Policy Iteration Theorem.

In deterministic MDPs with  $s_{t+1} = \mathcal{T}(s_t, a_t)$ ,  $r_t = r(s_t, a_t)$ , the value function of a state is defined as

$$V^\pi(s) = \sum_{t=0}^{\infty} \gamma^t r(s_t, a_t), \quad (12)$$

given  $s_0 = s$  is the initial state and  $a_t = \pi(s_t)$  comes from the deterministic policy  $\pi$ .

The learning objective is to find an optimal policy  $\pi$ , such that an optimal state value can be achieved:

$$V^*(s) = \max_{\pi} V^\pi(s) \quad (13)$$

The state-action value function ( $Q$ -function) is then defined as

$$Q(s, a) = r(s, a) + \gamma V^*(\mathcal{T}(s, a)) \quad (14)$$

Formally, the objective of action space pruning in action-redundant MDPs is to find an optimal policy  $\pi^{(G)} = G(\pi(s_t)|s_t) \odot \pi(s_t)$  with an action selector  $G : \mathcal{S} \times \mathcal{A} \mapsto \{0, 1\}^d$ ,

$$V^*(s) = \max_{\pi^{(G)}} V^{\pi^{(G)}}(s) = \max_{\pi} V^\pi(s), \quad (15)$$

with minimal number of actions selected, i.e.,  $|G|_0$  is minimized. The sufficient and necessary condition for Equation (15) to hold is  $r(s_t, \pi(s_t)) = r(s_t, \pi^{(G)}(s_t))$  and  $\mathcal{T}(s_t, \pi(s_t)) = \mathcal{T}(s_t, \pi^{(G)}(s_t))$ .

In general, the reward function  $r$  and transition dynamics  $\mathcal{T}$  may depend on different subsets of actions and the optimal, i.e.,  $r(s_t, a_t) = r(s_t, a_t^{(G_1)})$ , while  $\mathcal{T}(s_t, a_t) = \mathcal{T}(s_t, a_t^{(G_2)})$ , where  $G_1, G_2$  select different subset of given actions by  $a_t^{(G_1)} = G_1(a_t|s_t) \odot a_t$ ,  $a_t^{(G_2)} = G_2(a_t|s_t) \odot a_t$  but  $a_t^{(G_1)} \neq a_t^{(G_2)}$ . The final action selector  $G$  should be generated according to  $G(a|s) = G_1(a|s) \vee G_2(a|s)$ , where  $\vee$  is the element-wise **OR** operation.

Therefore, in our approximation of Dyn-SWAR, we assume  $G(a|s) = G_2(a|s)$  as an approximation for  $G(a|s) = G_1(a|s) \vee G_2(a|s)$ . Future work may include another predictive model for the reward function and take the element-wise **OR** operation to get  $G$ .

## B Additional Experiments

### B.1 Synthetic Data Experiment

The synthetic datasets are generated in the same way as [5, 37]. Specifically, there are 6 synthetic datasets that have inputs generated from an 11-dim Gaussian distribution without correlations across features. The label  $Y$  for each dataset is generated by a Bernoulli random variable with  $P(Y = 1|X) = \frac{1}{1+\text{logit}(X)}$ . In different tasks,  $\text{logit}(X)$  takes the value of:

- **Syn1**:  $\exp(X_1 X_2)$
- **Syn2**:  $\exp(\sum_{i=3}^6 X_i^2 - 4)$
- **Syn3**:  $-10 \times \sin 2X_7 + 2|X_8| + X_9 + \exp(-X_{10})$
- **Syn4**: if  $X_{11} < 0$ , logit follows **Syn1**, otherwise, logit follows **Syn2**
- **Syn5**: if  $X_{11} < 0$ , logit follows **Syn1**, otherwise, logit follows **Syn3**
- **Syn6**: if  $X_{11} < 0$ , logit follows **Syn2**, otherwise, logit follows **Syn3**

In the first three synthetic datasets, the label  $Y$  depends on the same feature across each dataset, while in the last three datasets, the subsets of features that label  $Y$  depends on are determined by the values of  $X_{11}$ .

Table 2: Relevant variables discovery results for Synthetic datasets with 11-dim input

| DATA SET | METHOD                               | ITERATION 1 |      | ITERATION 2 |            | ITERATION 3 |            | ITERATION 4 |            |
|----------|--------------------------------------|-------------|------|-------------|------------|-------------|------------|-------------|------------|
| METRIC   |                                      | TPR         | FDR  | TPR         | FDR        | TPR         | FDR        | TPR         | FDR        |
| Syn4     | INVASE (REP.)                        | 99.8        | 10.3 |             |            |             |            |             |            |
|          | INVASE (EXP.)                        | 98.6        | 1.6  | 98.1        | 1.1        | 98.1        | 1.1        | 98.1        | 1.1        |
|          | IC-INVASE ( $\lambda \uparrow 0.2$ ) | 99.7        | 3.4  | 99.7        | 2.6        | 99.7        | 2.5        | 99.7        | 2.5        |
|          | IC-INVASE ( $\lambda \uparrow 0.3$ ) | 99.3        | 1.6  | <b>99.3</b> | <b>0.8</b> | <b>99.3</b> | <b>0.8</b> | <b>99.3</b> | <b>0.8</b> |
| Syn5     | INVASE (REP.)                        | 84.8        | 1.1  |             |            |             |            |             |            |
|          | INVASE (EXP.)                        | 82.1        | 1.0  | 79.7        | 1.0        | 79.3        | 1.0        | 79.2        | 1.0        |
|          | IC-INVASE ( $\lambda \uparrow 0.2$ ) | 99.3        | 1.6  | 99.1        | 1.1        | 99.1        | 1.1        | 99.1        | 1.1        |
|          | IC-INVASE ( $\lambda \uparrow 0.3$ ) | 96.8        | 1.0  | <b>96.4</b> | <b>0.4</b> | <b>96.4</b> | <b>0.4</b> | <b>96.4</b> | <b>0.4</b> |
| Syn6     | INVASE (REP.)                        | 90.1        | 7.4  |             |            |             |            |             |            |
|          | INVASE (EXP.)                        | 92.3        | 1.7  | 89.8        | 1.6        | 89.6        | 1.6        | 89.6        | 1.6        |
|          | IC-INVASE ( $\lambda \uparrow 0.2$ ) | 99.6        | 2.9  | 99.5        | 2.6        | 99.5        | 2.5        | 99.5        | 2.5        |
|          | IC-INVASE ( $\lambda \uparrow 0.3$ ) | 99.4        | 1.9  | <b>99.3</b> | <b>1.6</b> | <b>99.3</b> | <b>1.6</b> | <b>99.3</b> | <b>1.6</b> |

For each dataset, 20,000 samples are generated and be separated into a training set and a testing set. In this work, we focus on finding outcome-relevant features (e.g., finding task-relevant actions in the context of RL), thus the true positive rate (TPR) and false discovery rate (FDR) are used as performance metrics.

**11-dim Feature Selection** Table 2 shows the quantitative results of the proposed method, IC-INVASE on the 11-dim feature selection tasks. To accelerate training and facilitate the usage of dynamical computational graphs in curriculum learning and RL settings, the vanilla INVASE is re-implemented with PyTorch [23]. In general, the PyTorch implementation is 4 to 5 times faster than the previous Keras [11, 6] implementation, with on-par performance on the 11-dim feature selection tasks. In the comparison, both the reported results in [37] (denoted by **INVASE (REP.)**) and our experimental results on INVASE (denoted by **INVASE (EXP.)**) are presented. The  $p_r$  curriculum for IC-INVASE in all experiments are set to decrease from 0.5 to 0.0 except in ablation studies. Results of two different choices of the  $\lambda$  curriculum are reported and denoted by **IC-INVASE ( $\lambda \uparrow \cdot$ )**, e.g.,  $\lambda \uparrow 0.3$  means  $\lambda$  increases from 0.0 to 0.3 in the experiment. We omit the results on the first three datasets (Syn1, Syn2, Syn3) where both IC-INVASE and INVASE achieve 100.0 TPR and 0.0 FDR. Iteration 1 to Iteration 4 in the table shows the results after applying the selection operator for different number of iterations.

In all experiments, IC-INVASE achieves better performance (i.e., larger TPR and lower FDR) than the vanilla INVASE with Keras and PyTorch implementation. Iterative applying the feature selection operator can reduce the FDR with a slight cost of TPR decay.

**100-dim Feature Selection** We then increase the total number of feature dimensions to 100 to demonstrate how IC-INVASE improves the vanilla INVASE in large-scale variable selection settings. In this experiment. The features are generated with 100-dim Gaussian without correlations and the rules for label generation are still the same as the 11-dim settings. (i.e., 89 additional label-independent noisy dimensions of input is concatenated to the 11-dim inputs.)

The results are shown in Table 3. IC-INVASE achieves much better performance in all datasets, i.e., higher TPR and lower FDR. The ablation studies on different curriculum show both an increasing  $\lambda$  and a decreasing  $p_r$  can benefit discovery of label-dependent features. As the hyper-parameters for curriculum are not elaborated in our experiments, direct combining the two curriculum may hinder the performance. The design for curriculum fusion is left to the future work.

## C Environment Details

**FourRewardMaze** The FourRewardMaze is a 2-D navigation task where an agent need to find all four solutions to achieve better performance. The state space is 2-D continuous vector indicating the position of the agent, while the action space is a 2-D continuous value indicating the direction and step length of the agent, which is limited to  $[-1, 1]$ . The initial location of the agent is randomly

Table 3: Relevant feature discovery results for Synthetic datasets with 100-dim input

| DATA SET | METHOD                           | ITERATION 1  |      | ITERATION 2  |      | ITERATION 3  |            | ITERATION 4  |            |
|----------|----------------------------------|--------------|------|--------------|------|--------------|------------|--------------|------------|
| METRIC   |                                  | TPR          | FDR  | TPR          | FDR  | TPR          | FDR        | TPR          | FDR        |
| Syn4     | INVASE (REP.)                    | 66.3         | 40.5 |              |      |              |            |              |            |
|          | INVASE (EXP.)                    | 27.0         | 6.5  | 18.0         | 6.4  | 18.0         | 6.4        | 18.0         | 6.4        |
|          | IC-INVASE W/O $p_r \downarrow$   | 66.3         | 40.5 | 66.3         | 40.5 | 66.3         | 40.5       | 66.3         | 40.5       |
|          | IC-INVASE W/O $\lambda \uparrow$ | 100.0        | 43.0 | 100.0        | 43.0 | 100.0        | 43.0       | 100.0        | 43.0       |
|          | IC-INVASE                        | <b>100.0</b> | 43.0 | <b>100.0</b> | 43.0 | <b>100.0</b> | 43.0       | <b>100.0</b> | 43.0       |
| Syn5     | INVASE (REP.)                    | 73.2         | 23.7 |              |      |              |            |              |            |
|          | INVASE (EXP.)                    | 56.4         | 37.9 | 56.4         | 37.9 | 56.4         | 37.9       | 56.4         | 37.9       |
|          | IC-INVASE W/O $p_r \downarrow$   | 90.9         | 7.8  | 88.8         | 4.4  | 88.8         | 4.3        | 88.8         | 4.3        |
|          | IC-INVASE W/O $\lambda \uparrow$ | 96.1         | 11.3 | 95.2         | 8.2  | <b>95.5</b>  | 8.1        | <b>95.5</b>  | 8.1        |
|          | IC-INVASE                        | 91.9         | 8.1  | 90.8         | 4.3  | <b>90.8</b>  | <b>4.2</b> | <b>90.8</b>  | <b>4.2</b> |
| Syn6     | INVASE (REP.)                    | 90.5         | 15.4 |              |      |              |            |              |            |
|          | INVASE (EXP.)                    | 90.1         | 43.7 | 90.1         | 43.7 | 90.1         | 43.7       | 90.1         | 43.7       |
|          | IC-INVASE W/O $p_r \downarrow$   | 98.5         | 4.1  | 98.4         | 2.4  | 98.4         | <b>2.3</b> | 98.4         | <b>2.3</b> |
|          | IC-INVASE W/O $\lambda \uparrow$ | 99.6         | 8.1  | 99.6         | 7.1  | <b>99.6</b>  | 7.0        | <b>99.6</b>  | 7.0        |
|          | IC-INVASE                        | 98.9         | 7.0  | 98.9         | 5.0  | <b>98.9</b>  | <b>4.9</b> | <b>98.9</b>  | <b>4.9</b> |

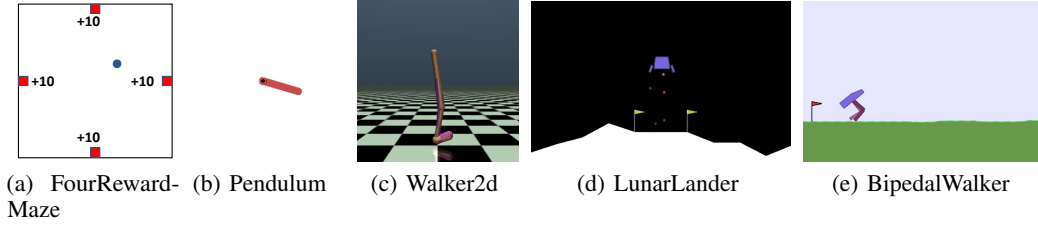

Figure 5: Environments used in experiments

406 selected for each game, and each episode has the length of 32, which is the timesteps needed to  
 407 collect all four rewards from any starting position.

408 **Pendulum-v0** The Pendulum-v0 environment is a classic problem in the control literature. In the  
 409 Pendulum-v0 of OpenAI Gym. The task has 3-D state space and 1-D action space. In every episode  
 410 the pendulum starts in a random position, and the learning objective is to swing the pendulum up and  
 411 keep it staying upright.

412 **Walker2d-v2** The Walker2d-v2 environment is a locomotion task where the learning objective is  
 413 to make a two-dimensional bipedal robot walk forward as fast as possible. The task has 17-D state  
 414 space and 6-D action space.

415 **LunarLanderContinuous-v2** In the tasks of LunarLanderContinuous-v2, the agent is asked to  
 416 control a lander to move from the top of the screen to a landing pad located at coordinate (0, 0). The  
 417 fuel is infinite, so an agent can learn to fly and then land on its first attempt. The state is as 8-D  
 418 real-valued vector and action is 2-D vector in the range of  $[-1, 1]$ , where the first dimension controls  
 419 main engine,  $[-1, 0]$  off,  $[0, 1]$  throttle from 50% to 100% power and the second value in  $[-1, -0.5]$   
 420 will fire left engine, while a value in  $[0.5, 1.0]$  fires right engine, otherwise the engine is off.

421 **BipedalWalker-v3** The BipedalWalker-v3 is a locomotion task where the state space is 24-D and  
 422 the action space is 4-D. The agent needs to walk as far as possible in each episode where a total  
 423 timestep of 1000 are given and total 300 points might be collected up to the far end. If the robot falls,  
 424 it gets  $-100$  points. Applying motor torque costs a small amount of points, more optimal agent will  
 425 get better score.

## 426 **D Reproduction Checklist**

### 427 **D.1 Neural Network Structure**

428 In all experiments, we use the same neural network structure: in TD3, we follow the vanilla  
429 implementation to use 3-layer fully connected neural networks where 256 hidden units are used. In  
430 the selector networks of the INVASE module, we follow the vanilla implementation to use 3-layer  
431 fully connected neural networks where 100, 200 hidden units are used.

### 432 **D.2 Hyper-Parameters**

433 In both TD-SWAR and the Dyn-SWAR, we apply IC-INVASE with  $p_r$  reducing from 0.5 to 0.0  
434 and  $\lambda$  increasing from 0.0 to 0.2. While our experiments have already shown the effectiveness and  
435 robustness of those hyper-parameters, performing grid search on those hyper-parameters may lead to  
436 further performance improvement.
